# Supplementary material for: Aberrant DNA methylation profiles in the premature aging disorders Hutchinson-Gilford Progeria and Werner syndrome
Source: PubMed Central journal article supplement — Epigenetics. 2013 Jan 1;8(1):28–33. doi: 10.4161/epi.23366 (PMC3549877; doi:10.4161/epi.23366), 2013-01-01
Supplement: epi-8-28-s01.pdf [file epi-8-28-s01.pdf]

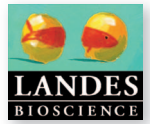

## **Supplemental Material to:**

**Holger Heyn, Sebastian Moran and Manel Esteller**

**Aberrant DNA methylation profiles in the premature aging  
disorders Hutchinson-Gilford Progeria  
and Werner Syndrome**

**Epigenetics 2013; 8(1)**

**<http://dx.doi.org/10.4161/epi.23366>**

**<http://www.landesbioscience.com/journals/epigenetics/article/23366>**

**Supplementary table 1:**

144 consistent dmCpG sites in AG07896/AG11385 and natural aged samples.

| <b>TargetID</b> | <b>Chr.</b> | <b>Position</b> | <b>Gene symbol</b> | <b>Location</b>   | <b>CpG context</b> |
|-----------------|-------------|-----------------|--------------------|-------------------|--------------------|
| cg09668627      | 1           | 1371844         | VWA1               | Body              | Island shore       |
| cg02136596      | 1           | 1384930         | ATAD3C             | Promoter          |                    |
| cg07312051      | 1           | 15656086        | FHAD1              | Body              |                    |
| cg17278062      | 1           | 17732728        |                    |                   | Island shore       |
| cg00352106      | 1           | 39864197        | MACF1              | Body              |                    |
| cg25369262      | 1           | 46649132        | TSPAN1             | Body              |                    |
| cg07107453      | 1           | 79114976        | IFI44              | Promoter          |                    |
| cg21863110      | 1           | 116380417       | NHLH2              | 3'UTR             | Island             |
| cg25216580      | 1           | 120173989       | ZNF697             | Promoter          |                    |
| cg00791854      | 1           | 154392070       | IL6R               | Body              |                    |
| cg17166812      | 1           | 161169574       | NDUFS2;ADAMTS4     | Promoter;Promoter | Island shelf       |
| cg17936236      | 1           | 167520305       | CREG1              | Body              | Island shelf       |
| cg21110645      | 1           | 207815933       |                    |                   | Island shelf       |
| cg01012879      | 1           | 244613363       | ADSS               | Body              | Island shore       |
| cg13973086      | 2           | 469105          |                    |                   | Island shore       |
| cg09074113      | 2           | 20870087        | GDF7               | Body              | Island             |
| cg06108254      | 2           | 72830705        | EXOC6B             | Body              |                    |
| cg22880770      | 2           | 97166341        | NEURL3             | Body              | Island             |
| cg11916609      | 2           | 102927488       | IL1RL1             | Promoter          |                    |
| cg20608990      | 2           | 202097607       | CASP8              | Promoter          |                    |
| cg15335768      | 2           | 218268053       | DIRC3              | Body              |                    |
| cg04731861      | 2           | 219085781       | ARPC2              | Body              | Island shelf       |
| cg04621728      | 2           | 234934131       |                    |                   |                    |
| cg16967583      | 2           | 241807859       | AGXT               | Promoter          |                    |
| cg08003402      | 3           | 15311021        | SH3BP5             | Body              |                    |
| cg12934382      | 3           | 51741135        | GRM2               | Promoter          | Island             |
| cg02331649      | 3           | 52926322        | TMEM110            | Body              |                    |
| cg13679804      | 3           | 59734950        |                    |                   |                    |
| cg20037507      | 3           | 62363248        |                    |                   | Island shore       |
| cg18746336      | 3           | 128216122       |                    |                   | Island             |
| cg00355829      | 3           | 128326679       |                    |                   | Island shore       |
| cg15467503      | 4           | 1727234         | TACC3              | Body              | Island shelf       |
| cg00076653      | 4           | 15341878        | C1QTNF7            | Body              |                    |
| cg26689483      | 4           | 17513197        | QDPR               | Body              | Island shore       |
| cg19676182      | 4           | 24981695        | CCDC149            | Promoter          |                    |
| cg09168222      | 4           | 89299733        | HERC6              | Promoter          | Island shore       |
| cg08736088      | 4           | 147866520       | TTC29              | Promoter          | Island shore       |
| cg24894783      | 5           | 10577031        | ANKRD33B           | Body              |                    |
| cg09017434      | 5           | 16179660        | MARCH11            | Promoter          | Island             |
| cg03873281      | 5           | 131608955       | PDLIM4             | 3'UTR             | Island shore       |
| cg17781669      | 5           | 149868359       |                    |                   | Island shelf       |
| cg02727079      | 6           | 17986167        | KIF13A             | Body              | Island shore       |
| cg14417687      | 6           | 30042260        | RNF39              | Body              | Island shore       |
| cg17091577      | 6           | 30854233        | DDR1               | Promoter          | Island shore       |
| cg00244776      | 6           | 30883192        | VAR52              | Body              | Island shore       |
| cg04665604      | 6           | 31696852        | DDAH2              | Body              | Island             |
| cg12988118      | 6           | 31744524        | C6orf27            | Body              |                    |
| cg22986222      | 6           | 32095276        | ATF6B              | Body              | Island shelf       |
| cg26069291      | 6           | 42716310        |                    |                   | Island shore       |
| cg22774605      | 6           | 47247047        | TNFRSF21           | Body              |                    |
| cg24690314      | 6           | 144018564       | PHACTR2            | Body              |                    |
| cg12419863      | 6           | 144263450       | PLAGL1             | Body              |                    |
| cg09595020      | 7           | 2654120         | IQCE               | 3'UTR             |                    |
| cg10822172      | 7           | 28338757        | CREB5              | Promoter          |                    |

|            |    |           |                  |               |              |
|------------|----|-----------|------------------|---------------|--------------|
| cg15626881 | 7  | 33923464  |                  |               |              |
| cg02060682 | 7  | 36190724  |                  |               | Island shore |
| cg19759064 | 7  | 56160687  | PHKG1            | Promoter      |              |
| cg15893346 | 7  | 65447565  | GUSB             | Promoter      | Island shore |
| cg09748749 | 7  | 65540429  | ASL              | Promoter      | Island shore |
| cg14667235 | 7  | 76026648  | ZP3;SRCRB4D      | Promoter;Body | Island shore |
| cg14823389 | 7  | 101398152 |                  |               |              |
| cg11961845 | 7  | 129008179 | AHCYL2           | Promoter      |              |
| cg19073171 | 7  | 154793806 | PAXIP1;LOC202781 | Body;Promoter | Island shore |
| cg23109344 | 8  | 496440    | C8orf42          | Promoter      | Island shore |
| cg26122129 | 8  | 30241119  | RBPMS            | Promoter      | Island shore |
| cg19496364 | 8  | 94551463  |                  |               |              |
| cg11057205 | 8  | 134588243 |                  |               | Island shelf |
| cg13707760 | 9  | 95986383  | WNK2             | Body          |              |
| cg10394788 | 9  | 124360547 | DAB2IP           | Body          | Island       |
| cg26581729 | 9  | 139939792 | NPDC1            | Body          | Island       |
| cg24381155 | 10 | 103289745 | BTRC             | Body          |              |
| cg23901918 | 10 | 105420747 | SH3PXD2A         | Body          | Island       |
| cg01213599 | 10 | 126704259 | CTBP2            | Body          |              |
| cg22891191 | 10 | 129706234 | PTPRE            | Promoter      | Island       |
| cg05895618 | 11 | 19222395  | CSRP3            | Promoter      |              |
| cg08214808 | 11 | 45922166  | MAPK8IP1         | Body          | Island       |
| cg04465784 | 11 | 67976953  | SUV420H1         | Promoter      | Island shelf |
| cg04265051 | 11 | 68079686  | LRP5             | Promoter      | Island shore |
| cg11155924 | 11 | 70449258  | SHANK2           | Body          |              |
| cg00242341 | 11 | 72447419  | ARAP1            | Promoter      |              |
| cg07101980 | 11 | 77780019  | NDUFC2           | 3'UTR         |              |
| cg01314044 | 11 | 94246036  |                  |               | Island shore |
| cg14242895 | 11 | 118393450 | MLL              | 3'UTR         |              |
| cg16983588 | 11 | 129793108 | PRDM10           | Body          |              |
| cg12409074 | 11 | 129870648 | PRDM10           | Promoter      | Island shore |
| cg08799922 | 12 | 7245030   | C1R              | Promoter      |              |
| cg27117982 | 12 | 16500077  | MGST1            | Promoter      |              |
| cg27651238 | 12 | 52644264  |                  |               | Island       |
| cg16726039 | 12 | 133413162 |                  |               | Island       |
| cg09337121 | 14 | 23769999  | PPP1R3E          | Body          | Island shore |
| cg07176842 | 14 | 43972223  |                  |               |              |
| cg25576997 | 14 | 56257750  | C14orf34         | Body          |              |
| cg18186343 | 14 | 101317620 | MIR770;MEG3      | Promoter;Body |              |
| cg03039990 | 14 | 101317622 | MIR770;MEG3      | Promoter;Body |              |
| cg18580117 | 15 | 42787236  | SNAP23           | Promoter      | Island shelf |
| cg06687489 | 15 | 52587077  | MYO5C            | Body          | Island shore |
| cg24665265 | 15 | 70852115  |                  |               |              |
| cg11442608 | 15 | 81456832  |                  |               |              |
| cg09763373 | 16 | 596899    | SOLH             | Body          | Island shore |
| cg05638439 | 16 | 711235    | WDR90            | Body          | Island       |
| cg09308553 | 16 | 56763573  | NUP93            | Promoter      | Island shore |
| cg03746976 | 16 | 58035805  | C16orf57         | Body          | Island shore |
| cg05969150 | 16 | 72882495  | ZFH3             | Body          |              |
| cg11801411 | 17 | 1628727   | WDR81            | Body          | Island       |
| cg03613822 | 17 | 7115140   | DLG4             | Body          | Island shelf |
| cg01538166 | 17 | 17743987  |                  |               | Island       |
| cg13895343 | 17 | 26708773  | SARM1            | Body          | Island       |
| cg04193015 | 17 | 35596680  | ACACA            | Body          |              |
| cg20629183 | 17 | 41985830  | MPP2             | Promoter      | Island shore |
| cg19057899 | 17 | 47093955  | IGF2BP1          | Body          | Island shore |
| cg22892904 | 17 | 77751089  | CBX2             | Promoter      | Island shore |
| cg19761273 | 17 | 80232096  | CSNK1D           | Promoter      | Island shore |
| cg24914483 | 18 | 2653997   |                  |               | Island shore |

|            |    |          |             |               |              |
|------------|----|----------|-------------|---------------|--------------|
| cg20916427 | 18 | 44627440 | KATNAL2     | 3'UTR         |              |
| cg24304425 | 19 | 840985   | PRTN3       | Promoter      | Island shelf |
| cg26316885 | 19 | 10407317 | ICAM5       | 3'UTR         | Island       |
| cg18745507 | 19 | 10415557 | ZGLP1       | 3'UTR         |              |
| cg11453058 | 19 | 14064176 | PODNL1      | Promoter      | Island shore |
| cg08196968 | 19 | 38746749 | PPP1R14A    | Body          | Island       |
| cg25734726 | 19 | 40948296 | SERTAD3     | Promoter      | Island shore |
| cg22891070 | 19 | 46801642 | HIF3A       | Body          | Island shore |
| cg16672562 | 19 | 46801672 | HIF3A       | Promoter      | Island shore |
| cg16617301 | 19 | 46999109 | PNMAL2      | Promoter      | Island       |
| cg23314866 | 19 | 48016020 | NAPA        | Body          | Island shore |
| cg00822241 | 19 | 49201468 | FUT2        | Promoter      | Island shore |
| cg05925291 | 19 | 54617809 | PRPF31;TFPT | Promoter;Body | Island shore |
| cg24263062 | 20 | 2730191  | EBF4        | Body          | Island       |
| cg24165121 | 20 | 23398291 | NAPB        | Body          | Island shelf |
| cg01260366 | 20 | 32307172 | PXMP4       | Body          | Island shore |
| cg19811118 | 20 | 43160245 | PKIG        | Promoter      | Island shore |
| cg00340958 | 20 | 48328658 | B4GALT5     | Body          | Island shore |
| cg06260709 | 20 | 48626621 |             |               | Island       |
| cg11074047 | 20 | 50157455 | NFATC2      | Body          | Island shore |
| cg11853697 | 20 | 60510235 | CDH4        | Body          | Island shore |
| cg11726250 | 20 | 61924405 | COL20A1     | Promoter      | Island shelf |
| cg22138735 | 20 | 62679713 | SOX18       | Body          | Island       |
| cg24753998 | 21 | 30452964 | C21orf7     | Promoter      |              |
| cg16057826 | 21 | 36041334 | CLIC6       | Promoter      | Island       |
| cg26390598 | 21 | 41032396 | B3GALT5     | Promoter      |              |
| cg00546897 | 21 | 45232232 | LOC284837   | Body          |              |
| cg13762691 | 22 | 17956560 | CECR2       | Promoter      |              |
| cg06942979 | 22 | 31501382 | SELM        | Body          | Island shore |
| cg01264106 | 22 | 38071602 | LGALS1      | Promoter      | Island shore |
| cg19582200 | 22 | 43602629 | SCUBE1      | Body          | Island shelf |

**Supplementary table 2:**

485 consistent dmCpG sites in AG19911 and natural aged samples.

| <b>TargetID</b> | <b>Chr.</b> | <b>Position</b> | <b>Gene symbol</b> | <b>Location</b>   | <b>CpG context</b> |
|-----------------|-------------|-----------------|--------------------|-------------------|--------------------|
| cg09668627      | 1           | 1371844         | VWA1               | Body              | Island shore       |
| cg02136596      | 1           | 1384930         | ATAD3C             | Promoter          |                    |
| cg12639453      | 1           | 2035780         | PRKCZ              | Promoter          | Island shelf       |
| cg01101873      | 1           | 3269478         | PRDM16             | Body              |                    |
| cg01556552      | 1           | 10695686        |                    |                   | Island shelf       |
| cg25978218      | 1           | 15738732        | EFHD2              | Body              | Island shore       |
| cg17670191      | 1           | 17026406        | ESPNP              | Body              | Island             |
| cg17278062      | 1           | 17732728        |                    |                   | Island shore       |
| cg26561681      | 1           | 21376633        | EIF4G3             | Promoter          |                    |
| cg19743168      | 1           | 23544995        |                    |                   | Island shore       |
| cg25187161      | 1           | 29510025        | SFRS4              | Promoter          | Island shore       |
| cg19412669      | 1           | 36839270        | STK40              | Promoter          |                    |
| cg12634306      | 1           | 40098811        | HEYL               | Body              |                    |
| cg21862529      | 1           | 41948212        | EDN2               | Body              |                    |
| cg09160123      | 1           | 41981735        | HIVEP3             | Body              | Island shore       |
| cg26038582      | 1           | 42384390        | HIVEP3             | Promoter          | Island shore       |
| cg15937073      | 1           | 42384564        | HIVEP3             | Promoter          | Island shore       |
| cg12081325      | 1           | 45413279        | EIF2B3             | Body              |                    |
| cg27532171      | 1           | 46952054        |                    |                   | Island shore       |
| cg21536783      | 1           | 59041407        | TACSTD2            | 3'UTR             | Island shore       |
| cg27427318      | 1           | 61509328        |                    |                   | Island shore       |
| cg16991569      | 1           | 63142359        | DOCK7              | Body              |                    |
| cg08110488      | 1           | 82136224        |                    |                   |                    |
| cg14378231      | 1           | 98404032        |                    |                   |                    |
| cg24681307      | 1           | 110526191       | AHCYL1             | Promoter          | Island shore       |
| cg25674286      | 1           | 112046915       | ADORA3             | Body              |                    |
| cg21863110      | 1           | 116380417       | NHLH2              | 3'UTR             | Island             |
| cg01974375      | 1           | 151298954       | PI4KB              | Promoter          | Island shore       |
| cg20324858      | 1           | 154529936       | UBE2Q1             | Body              | Island shore       |
| cg13795986      | 1           | 155880507       | RIT1               | Body              |                    |
| cg09796170      | 1           | 156548174       | TTC24              | Promoter          |                    |
| cg07349663      | 1           | 160261619       | COPA               | Body              |                    |
| cg11578532      | 1           | 161008127       | TSTD1              | Body              | Island shore       |
| cg17166812      | 1           | 161169574       | NDUFS2;ADAMTS4     | Promoter;Promoter | Island shelf       |
| cg07580762      | 1           | 161171810       | NDUFS2             | Promoter          | Island             |
| cg21691116      | 1           | 161171819       | NDUFS2             | Promoter          | Island             |
| cg11155784      | 1           | 164572163       | PBX1               | Body              |                    |
| cg14748380      | 1           | 179713788       | FAM163A            | Promoter          | Island             |
| cg24460126      | 1           | 179713828       | FAM163A            | Promoter          | Island             |
| cg25408950      | 1           | 198290080       | NEK7               | 3'UTR             |                    |
| cg14780255      | 1           | 201720358       | NAV1               | Body              |                    |
| cg02769705      | 1           | 202975059       | TMEM183B           | Promoter          | Island shore       |
| cg19081101      | 1           | 203156625       | CHI3L1             | Promoter          |                    |
| cg05721773      | 1           | 207083336       | FAIM3              | Body              | Island shore       |
| cg21110645      | 1           | 207815933       |                    |                   | Island shelf       |
| cg22787719      | 1           | 209570949       |                    |                   |                    |
| cg07168232      | 1           | 209822928       | LAMB3              | Body              |                    |
| cg15134583      | 1           | 224015075       | TP53BP2            | Body              |                    |
| cg11145399      | 1           | 224034478       | TP53BP2            | Promoter          | Island shore       |
| cg04193160      | 1           | 228400419       | OBSCN              | Body              | Island             |
| cg24070990      | 1           | 228634724       |                    |                   | Island shore       |
| cg16516400      | 1           | 231177201       | FAM89A             | Promoter          | Island shore       |
| cg09548403      | 1           | 232840764       |                    |                   |                    |
| cg09823288      | 1           | 239552128       |                    |                   | Island shore       |

|            |   |           |             |               |              |
|------------|---|-----------|-------------|---------------|--------------|
| cg25683662 | 1 | 245771036 | KIF26B      | Body          |              |
| cg14830002 | 1 | 247616686 | OR2B11      | Promoter      | Island shore |
| cg23230830 | 1 | 248903100 | LOC646627   | Promoter      |              |
| cg13973086 | 2 | 469105    |             |               | Island shore |
| cg08398132 | 2 | 8557381   |             |               |              |
| cg10646145 | 2 | 9235600   |             |               |              |
| cg22495058 | 2 | 11752373  | GREB1       | Body          | Island shore |
| cg00484122 | 2 | 20579065  |             |               |              |
| cg09074113 | 2 | 20870087  | GDF7        | Body          | Island       |
| cg25101396 | 2 | 27346296  | ABHD1       | Promoter      | Island shore |
| cg07858848 | 2 | 43087177  |             |               |              |
| cg19275978 | 2 | 60983087  | PAPOLG      | Promoter      | Island shore |
| cg10855531 | 2 | 62702472  |             |               |              |
| cg21852792 | 2 | 71678463  |             |               | Island shelf |
| cg06108254 | 2 | 72830705  | EXOC6B      | Body          |              |
| cg13391675 | 2 | 80009927  | CTNNA2      | Body          |              |
| cg10203483 | 2 | 85646239  |             |               | Island shore |
| cg22880770 | 2 | 97166341  | NEURL3      | Body          | Island       |
| cg18145105 | 2 | 97166422  | NEURL3      | Body          | Island       |
| cg11916609 | 2 | 102927488 | IL1RL1      | Promoter      |              |
| cg18145759 | 2 | 109901466 | SH3RF3      | Body          |              |
| cg06021088 | 2 | 127822551 | BIN1        | Body          |              |
| cg13700939 | 2 | 128166166 |             |               | Island       |
| cg07143462 | 2 | 157289513 |             |               | Island shelf |
| cg00760729 | 2 | 161236088 | RBMS1       | Body          |              |
| cg15739581 | 2 | 166626783 | GALNT3      | Body          |              |
| cg23808213 | 2 | 166948291 |             |               |              |
| cg00883212 | 2 | 173795201 | RAPGEF4     | Body          |              |
| cg16164923 | 2 | 197504013 | CCDC150     | Promoter      | Island shore |
| cg11608958 | 2 | 207836769 |             |               |              |
| cg02577773 | 2 | 208027870 | KLF7        | Body          | Island shelf |
| cg15335768 | 2 | 218268053 | DIRC3       | Body          |              |
| cg04731861 | 2 | 219085781 | ARPC2       | Body          | Island shelf |
| cg19701828 | 2 | 219235515 |             |               | Island shelf |
| cg21566642 | 2 | 233284661 |             |               | Island       |
| cg04621728 | 2 | 234934131 |             |               |              |
| cg12157614 | 2 | 236890427 | AGAP1       | Body          |              |
| cg20513777 | 2 | 238533299 |             |               | Island shelf |
| cg05758467 | 2 | 240035894 | HDAC4       | Body          | Island shelf |
| cg16967583 | 2 | 241807859 | AGXT        | Promoter      |              |
| cg24371033 | 2 | 241807924 | AGXT        | Promoter      |              |
| cg00085013 | 3 | 14871570  | FGD5        | Body          |              |
| cg26792295 | 3 | 16540091  | RFTN1       | Promoter      |              |
| cg23715029 | 3 | 42201568  | TRAK1       | Body          |              |
| cg24595152 | 3 | 43733831  | ABHD5       | Body          | Island shore |
| cg08033130 | 3 | 45983597  | CXCR6;FYCO1 | Promoter;Body |              |
| cg13719901 | 3 | 46608139  | LRRC2       | Promoter      | Island shore |
| cg00906812 | 3 | 47018657  | CCDC12      | Promoter      | Island shore |
| cg25021247 | 3 | 49460162  | AMT         | Promoter      |              |
| cg00664406 | 3 | 51740875  | GRM2        | Promoter      | Island       |
| cg12934382 | 3 | 51741135  | GRM2        | Promoter      | Island       |
| cg00303541 | 3 | 51741280  | GRM2        | Promoter      | Island       |
| cg02331649 | 3 | 52926322  | TMEM110     | Body          |              |
| cg13679804 | 3 | 59734950  |             |               |              |
| cg20037507 | 3 | 62363248  |             |               | Island shore |
| cg08173709 | 3 | 71103443  | FOXP1       | Body          |              |
| cg23333146 | 3 | 71731211  | EIF4E3      | 3'UTR         |              |
| cg26108120 | 3 | 72440793  | RYBP        | Body          |              |
| cg25338134 | 3 | 72940510  | GXYLT2      | Body          |              |

|            |   |           |                 |               |              |
|------------|---|-----------|-----------------|---------------|--------------|
| cg24969820 | 3 | 98497864  | ST3GAL6         | Body          |              |
| cg20267101 | 3 | 113006232 | BOC;WDR52       | 3'UTR;3'UTR   |              |
| cg24954207 | 3 | 128217091 |                 |               | Island shore |
| cg07593390 | 3 | 136714183 | IL20RB          | Body          |              |
| cg23466339 | 3 | 138066434 | MRAS            | Promoter      | Island shore |
| cg21552014 | 3 | 146026497 |                 |               |              |
| cg06800962 | 3 | 149096029 | TM4SF1          | Promoter      |              |
| cg24474182 | 3 | 151047307 | MED12L;P2RY13   | Body;Promoter |              |
| cg06168950 | 3 | 154737057 |                 |               |              |
| cg04481170 | 3 | 158445995 | RARRES1         | Body          | Island shelf |
| cg18123677 | 3 | 167454339 | SERPINI1        | Promoter      | Island shore |
| cg09696560 | 3 | 185178617 | MAP3K13         | Body          |              |
| cg08179817 | 4 | 4335184   |                 |               |              |
| cg16760587 | 4 | 17517594  | CLRN2           | Body          | Island shelf |
| cg17173896 | 4 | 24975754  | CCDC149         | Promoter      |              |
| cg19676182 | 4 | 24981695  | CCDC149         | Promoter      |              |
| cg17688837 | 4 | 25090665  |                 |               | Island shore |
| cg02170478 | 4 | 55100995  | PDGFRA          | Promoter      | Island shore |
| cg24918767 | 4 | 88297189  | HSD17B11        | Body          |              |
| cg00382138 | 4 | 110723299 | CFI             | Promoter      |              |
| cg13056653 | 4 | 141538969 |                 |               |              |
| cg03476007 | 4 | 143768727 | INPP4B          | Promoter      | Island shore |
| cg08736088 | 4 | 147866520 | TTC29           | Promoter      | Island shore |
| cg20818457 | 4 | 154179401 | TRIM2           | Body          |              |
| cg03065175 | 4 | 155661758 |                 |               | Island       |
| cg02140579 | 4 | 159091837 | FAM198B         | Body          |              |
| cg04399899 | 4 | 160189254 | RAPGEF2         | Promoter      |              |
| cg02525719 | 4 | 183728549 |                 |               | Island shore |
| cg20639618 | 4 | 183729073 |                 |               | Island       |
| cg21633052 | 4 | 184018637 | C4orf38         | Body          | Island shore |
| cg09017434 | 5 | 16179660  | MARCH11         | Promoter      | Island       |
| cg16578742 | 5 | 35617687  | SPEF2           | Promoter      | Island shore |
| cg24539599 | 5 | 112824920 | MCC             | Promoter      | Island shore |
| cg26811372 | 5 | 140772182 | PCDHGA4 cluster | Body          | Island shore |
| cg06677890 | 5 | 149887486 | NDST1           | Promoter      |              |
| cg22594985 | 5 | 153457958 |                 |               |              |
| cg13954457 | 5 | 167956819 | FBLL1           | Body          | Island       |
| cg23476877 | 5 | 176543964 |                 |               | Island       |
| cg01287088 | 5 | 176827392 | PFN3            | Promoter      | Island       |
| cg06033531 | 5 | 176980153 | FAM193B         | Promoter      | Island shore |
| cg00549219 | 5 | 177370476 |                 |               | Island shore |
| cg21010202 | 6 | 1615843   |                 |               | Island       |
| cg27095915 | 6 | 1624442   | GMDS            | Body          | Island       |
| cg12662084 | 6 | 17809126  | KIF13A          | Body          |              |
| cg03089870 | 6 | 17988960  | KIF13A          | Promoter      | Island shore |
| cg09248660 | 6 | 24969848  |                 |               |              |
| cg25583651 | 6 | 29570040  | GABBR1          | 3'UTR         |              |
| cg27342919 | 6 | 30079256  | TRIM31          | Body          |              |
| cg21809927 | 6 | 30079265  | TRIM31          | Body          |              |
| cg08222513 | 6 | 30079280  | TRIM31          | Body          |              |
| cg02049405 | 6 | 30095265  |                 |               | Island       |
| cg15978899 | 6 | 30882994  | VAR52           | Body          | Island shore |
| cg00244776 | 6 | 30883192  | VAR52           | Body          | Island shore |
| cg06151074 | 6 | 31669888  | BAT5            | Body          | Island shore |
| cg06928741 | 6 | 31691430  | C6orf25         | Body          | Island       |
| cg05667097 | 6 | 31691481  | C6orf25         | Body          | Island       |
| cg04665604 | 6 | 31696852  | DDAH2           | Body          | Island       |
| cg25264948 | 6 | 31734232  | C6orf27         | Body          |              |
| cg23526676 | 6 | 31734458  | C6orf27         | Body          |              |

|            |   |           |              |                   |              |
|------------|---|-----------|--------------|-------------------|--------------|
| cg15501231 | 6 | 31737630  | C6orf27      | Body              |              |
| cg12988118 | 6 | 31744524  | C6orf27      | Body              |              |
| cg19577206 | 6 | 31866825  | EHMT2        | Promoter          | Island shore |
| cg22986222 | 6 | 32095276  | ATF6B        | Body              | Island shelf |
| cg09713850 | 6 | 32921791  | HLA-DMA      | Promoter          |              |
| cg12397463 | 6 | 33128825  |              |                   | Island shore |
| cg07715777 | 6 | 33128963  |              |                   | Island shore |
| cg22273555 | 6 | 33130034  |              |                   | Island shore |
| cg11920449 | 6 | 36645608  | CDKN1A       | Promoter          | Island shore |
| cg08784966 | 6 | 37248768  | TBC1D22B     | Body              |              |
| cg07188523 | 6 | 44528793  |              |                   |              |
| cg01946401 | 6 | 45296101  | SUPT3H;RUNX2 | Promoter;Promoter |              |
| cg23261343 | 6 | 45413792  | RUNX2        | Body              |              |
| cg22774605 | 6 | 47247047  | TNFRSF21     | Body              |              |
| cg19607845 | 6 | 52934457  | FBXO9        | Body              | Island shelf |
| cg22322277 | 6 | 75459158  |              |                   |              |
| cg25015371 | 6 | 108874950 |              |                   | Island shelf |
| cg14289461 | 6 | 112575929 | LAMA4        | Promoter          | Island shore |
| cg14575356 | 6 | 130013903 | ARHGAP18     | Body              |              |
| cg24964103 | 6 | 133035379 | VNN1         | Promoter          |              |
| cg06899237 | 6 | 153353519 | RGS17        | Body              |              |
| cg07223240 | 6 | 170468271 |              |                   |              |
| cg04633141 | 7 | 1588319   | TMEM184A     | Body              | Island shore |
| cg09595020 | 7 | 2654120   | IQCE         | 3'UTR             |              |
| cg18446336 | 7 | 2847575   | GNA12        | Body              |              |
| cg08090407 | 7 | 7139271   |              |                   |              |
| cg04089901 | 7 | 7557590   | COL28A1      | Body              |              |
| cg27380915 | 7 | 12796513  |              |                   |              |
| cg24350771 | 7 | 18329602  |              |                   |              |
| cg12510708 | 7 | 26193805  | NFE2L3       | Body              | Island shore |
| cg04027736 | 7 | 27143403  | HOXA2        | Promoter          | Island       |
| cg20704555 | 7 | 28127748  | JAZF1        | Body              |              |
| cg23418219 | 7 | 28338684  | CREB5        | Promoter          |              |
| cg02506717 | 7 | 28338790  | CREB5        | Promoter          |              |
| cg15626881 | 7 | 33923464  |              |                   |              |
| cg24497732 | 7 | 42278077  | GLI3         | Promoter          | Island shore |
| cg07488141 | 7 | 47560215  | TNS3         | Promoter          |              |
| cg19759064 | 7 | 56160687  | PHKG1        | Promoter          |              |
| cg08370546 | 7 | 56160770  | PHKG1        | Promoter          |              |
| cg21940640 | 7 | 56160893  | PHKG1        | Promoter          |              |
| cg15893346 | 7 | 65447565  | GUSB         | Promoter          | Island shore |
| cg09748749 | 7 | 65540429  | ASL          | Promoter          | Island shore |
| cg03193328 | 7 | 65746852  | TPST1        | Body              |              |
| cg22455527 | 7 | 73241878  |              |                   | Island shelf |
| cg12856114 | 7 | 73242028  |              |                   | Island shelf |
| cg14667235 | 7 | 76026648  | ZP3;SRCRB4D  | Promoter;Body     | Island shore |
| cg26688582 | 7 | 91477554  |              |                   |              |
| cg20782117 | 7 | 95865631  | SLC25A13     | Body              |              |
| cg14398883 | 7 | 101398184 |              |                   |              |
| cg24707573 | 7 | 101961796 | SH2B2        | Body              | Island       |
| cg11752788 | 7 | 123438230 |              |                   |              |
| cg16248756 | 7 | 127795594 |              |                   |              |
| cg11961845 | 7 | 129008179 | AHCYL2       | Promoter          |              |
| cg22057675 | 7 | 140103545 | RAB19        | Promoter          |              |
| cg01106572 | 7 | 150744384 | ACCN3ABCB8   | Promoter          | Island shore |
| cg12538435 | 7 | 150801757 | AGAP3        | Body              |              |
| cg01058360 | 7 | 151442371 | PRKAG2       | Body              |              |
| cg05809437 | 8 | 1450031   | DLGAP2       | Promoter          |              |
| cg20305578 | 8 | 1908301   |              |                   |              |



|            |    |           |                |                   |              |
|------------|----|-----------|----------------|-------------------|--------------|
| cg12036735 | 8  | 20169916  |                |                   |              |
| cg26122129 | 8  | 30241119  | RBPMS          | Promoter          | Island shore |
| cg10327067 | 8  | 37549202  |                |                   | Island shelf |
| cg19695041 | 8  | 38615330  | TACC1          | Promoter          | Island shore |
| cg01632240 | 8  | 42009223  | AP3M2          | Promoter          | Island shore |
| cg17292662 | 8  | 54758936  |                |                   | Island shelf |
| cg19678968 | 8  | 59185164  |                |                   |              |
| cg19496364 | 8  | 94551463  |                |                   |              |
| cg11057205 | 8  | 134588243 |                |                   | Island shelf |
| cg24107665 | 8  | 144372932 | ZNF696         | Promoter          | Island       |
| cg07013148 | 8  | 146233339 |                |                   |              |
| cg07158339 | 9  | 71650237  | FXN            | Promoter          | Island shore |
| cg16509045 | 9  | 77502963  | TRPM6          | Promoter          | Island shore |
| cg14438325 | 9  | 124023910 |                |                   |              |
| cg10394788 | 9  | 124360547 | DAB2IP         | Body              | Island       |
| cg17930194 | 9  | 124982834 | LHX6           | Body              | Island       |
| cg00300627 | 9  | 132646360 |                |                   | Island shore |
| cg13754665 | 9  | 136654631 | VAV2           | Body              |              |
| cg14243817 | 9  | 138876879 |                |                   | Island shelf |
| cg14126392 | 9  | 138985942 | NACC2          | Promoter          | Island       |
| cg21120249 | 9  | 139921971 | C9orf139;ABCA2 | Promoter;Body     | Island shore |
| cg13579295 | 9  | 140069745 | ANAPC2         | Body              | Island shore |
| cg13274149 | 9  | 140175393 | C9orf167       | 3'UTR             | Island       |
| cg03383434 | 9  | 140318662 | EXD3;NOXA1     | Promoter;Body     | Island       |
| cg13811936 | 9  | 141017001 | CACNA1B        | 3'UTR             | Island shelf |
| cg09877009 | 10 | 6605133   | PRKCQ          | Promoter          |              |
| cg15835339 | 10 | 10828105  | SFTA1P         | Body              |              |
| cg01283625 | 10 | 13568099  |                |                   | Island shelf |
| cg17078883 | 10 | 28759936  |                |                   |              |
| cg19307545 | 10 | 35028929  | PARD3          | Body              |              |
| cg12479507 | 10 | 57390047  |                |                   | Island shore |
| cg20283498 | 10 | 73387917  | CDH23          | Body              |              |
| cg18786171 | 10 | 75935758  | ADK            | Body              | Island shore |
| cg05552874 | 10 | 91153143  | IFIT1          | Body              |              |
| cg07225966 | 10 | 94820376  | CYP26C1        | Promoter          | Island       |
| cg15903032 | 10 | 101297605 |                |                   | Island       |
| cg24381155 | 10 | 103289745 | BTRC           | Body              |              |
| cg05042708 | 10 | 105212813 | CALHM2         | Promoter          | Island shore |
| cg23901918 | 10 | 105420747 | SH3PXD2A       | Body              | Island       |
| cg05329352 | 10 | 112838983 | ADRA2A         | Promoter          | Island       |
| cg01213599 | 10 | 126704259 | CTBP2          | Body              |              |
| cg14479798 | 10 | 129533998 |                |                   | Island shore |
| cg22891191 | 10 | 129706234 | PTPRE          | Promoter          | Island       |
| cg07986469 | 10 | 129795003 | PTPRE          | Promoter          |              |
| cg15281331 | 10 | 133879497 |                |                   | Island shore |
| cg24427660 | 11 | 818892    | PNPLA2         | Promoter          | Island shore |
| cg15232290 | 11 | 1785683   | CTSD;HCCA2     | Promoter;Promoter | Island shore |
| cg20973931 | 11 | 1785695   | CTSD;HCCA2     | Promoter;Promoter | Island shore |
| cg05586607 | 11 | 1965447   |                |                   | Island shelf |
| cg17611235 | 11 | 1991188   |                |                   | Island       |
| cg03306615 | 11 | 2292890   | ASCL2          | Promoter          | Island       |
| cg13059136 | 11 | 2986541   | SNORA54;NAP1L4 | Promoter;Body     |              |
| cg21052766 | 11 | 20134289  | NAV2           | Body              |              |
| cg13837679 | 11 | 44329915  | ALX4           | Body              | Island shore |
| cg13809236 | 11 | 45908036  | MAPK8IP1       | Body              | Island shore |
| cg08214808 | 11 | 45922166  | MAPK8IP1       | Body              | Island       |
| cg00187686 | 11 | 59634218  | TCN1           | Promoter          |              |
| cg14328641 | 11 | 59822727  | MS4A3          | Promoter          |              |
| cg03559942 | 11 | 62521055  | ZBTB3          | Body              | Island shore |

|            |    |           |             |               |              |
|------------|----|-----------|-------------|---------------|--------------|
| cg20705781 | 11 | 67070238  | SSH3        | Promoter      | Island shore |
| cg06518251 | 11 | 67776030  | ALDH3B1     | Promoter      |              |
| cg04465784 | 11 | 67976953  | SUV420H1    | Promoter      | Island shelf |
| cg04265051 | 11 | 68079686  | LRP5        | Promoter      | Island shore |
| cg11194613 | 11 | 70268728  | CTTN        | Body          |              |
| cg11155924 | 11 | 70449258  | SHANK2      | Body          |              |
| cg10010533 | 11 | 82445170  | FAM181B     | Promoter      | Island shore |
| cg02175321 | 11 | 103930844 | PDGFD       | Body          |              |
| cg22033281 | 11 | 111325754 |             |               |              |
| cg03962678 | 11 | 118398094 | TTC36       | Promoter      | Island shelf |
| cg26878709 | 11 | 120197138 | TMEM136     | Promoter      | Island shore |
| cg10647465 | 11 | 126582242 | KIRREL3     | Body          |              |
| cg16983588 | 11 | 129793108 | PRDM10      | Body          |              |
| cg12409074 | 11 | 129870648 | PRDM10      | Promoter      | Island shore |
| cg01692842 | 11 | 134126364 | ACAD8       | Body          | Island shelf |
| cg16728539 | 12 | 2451169   | CACNA1C     | Body          |              |
| cg18173184 | 12 | 6718378   |             |               | Island shore |
| cg05060607 | 12 | 8211391   | C3AR1       | Body          |              |
| cg22916586 | 12 | 12686957  | DUSP16      | Promoter      |              |
| cg11905611 | 12 | 14720974  | PLBD1       | Promoter      | Island       |
| cg22221831 | 12 | 15039397  | MGP         | Promoter      |              |
| cg17817168 | 12 | 22486454  | ST8SIA1     | Body          | Island shore |
| cg13594630 | 12 | 32108895  |             |               | Island shelf |
| cg00832457 | 12 | 32287236  | BICD1       | Body          |              |
| cg05190176 | 12 | 48290002  | VDR         | Promoter      |              |
| cg27651238 | 12 | 52644264  |             |               | Island       |
| cg11848173 | 12 | 56121015  | CD63        | Body          | Island shore |
| cg00293940 | 12 | 60044871  |             |               |              |
| cg12707346 | 12 | 64960957  |             |               |              |
| cg20922821 | 12 | 94070578  | CRADD       | Promoter      | Island shore |
| cg26537335 | 12 | 105136339 | CHST11      | Body          |              |
| cg14829814 | 12 | 108294894 |             |               | Island shelf |
| cg06196801 | 12 | 121164025 | ACADS       | Body          | Island shore |
| cg07529210 | 12 | 122019110 | KDM2B       | Promoter      | Island shore |
| cg23060047 | 12 | 130819504 |             |               | Island shelf |
| cg13315047 | 12 | 131261143 |             |               |              |
| cg16726039 | 12 | 133413162 |             |               | Island       |
| cg11845168 | 13 | 21457096  | XPO4        | Body          |              |
| cg05830425 | 13 | 21654356  |             |               |              |
| cg15234627 | 13 | 33837178  | STARD13     | Body          |              |
| cg03278564 | 13 | 49200201  |             |               |              |
| cg12861503 | 13 | 52734071  | NEK3        | Promoter      | Island shore |
| cg18535410 | 13 | 113793268 | F10         | Body          |              |
| cg09337121 | 14 | 23769999  | PPP1R3E     | Body          | Island shore |
| cg07176842 | 14 | 43972223  |             |               |              |
| cg25576997 | 14 | 56257750  | C14orf34    | Body          |              |
| cg24025255 | 14 | 69617774  | DCAF5       | Body          | Island shore |
| cg12848614 | 14 | 70193496  |             |               | Island       |
| cg06992688 | 14 | 94491958  | OTUB2       | Promoter      | Island shore |
| cg01022345 | 14 | 101317819 | MIR770;MEG3 | Promoter;Body |              |
| cg05873568 | 14 | 105155145 | INF2        | Promoter      | Island shore |
| cg02392882 | 15 | 29031879  |             |               | Island shore |
| cg04870120 | 15 | 32999748  |             |               |              |
| cg15175581 | 15 | 33360262  | FMN1        | Promoter      |              |
| cg09347959 | 15 | 33360271  | FMN1        | Promoter      |              |
| cg07047589 | 15 | 40642998  | PHGR1       | Promoter      |              |
| cg18580117 | 15 | 42787236  | SNAP23      | Promoter      | Island shelf |
| cg05061769 | 15 | 59700360  |             |               |              |
| cg24665265 | 15 | 70852115  |             |               |              |

|            |    |          |                 |               |              |
|------------|----|----------|-----------------|---------------|--------------|
| cg06856840 | 15 | 80446451 | FAH             | Body          |              |
| cg22812413 | 15 | 81391742 |                 |               |              |
| cg11442608 | 15 | 81456832 |                 |               |              |
| cg00525011 | 16 | 122031   | RHBDF1          | Promoter      | Island       |
| cg03363565 | 16 | 474528   | RAB11FIP3       | Promoter      | Island shore |
| cg09408143 | 16 | 524778   | RAB11FIP3       | Body          |              |
| cg09763373 | 16 | 596899   | SOLH            | Body          | Island shore |
| cg05638439 | 16 | 711235   | WDR90           | Body          | Island       |
| cg03829194 | 16 | 875571   |                 |               | Island       |
| cg08190844 | 16 | 2526203  | TBC1D24         | Promoter      | Island shore |
| cg01215511 | 16 | 2975552  | FLYWCH1         | Promoter      |              |
| cg10111352 | 16 | 16082095 | ABCC1           | Body          |              |
| cg01157559 | 16 | 29166162 |                 |               | Island shelf |
| cg26843872 | 16 | 30368792 | TBC1D10B        | 3'UTR         | Island shelf |
| cg03042477 | 16 | 31472055 | ARMC5           | Body          | Island shore |
| cg26929700 | 16 | 49732567 | ZNF423          | Body          | Island       |
| cg00921350 | 16 | 50701499 | SNX20           | 3'UTR         |              |
| cg07280206 | 16 | 56554249 | BBS2            | Promoter      | Island shore |
| cg01932823 | 16 | 57701726 | GPR97           | Promoter      |              |
| cg02078525 | 16 | 66400395 | CDH5            | Promoter      |              |
| cg00401972 | 16 | 66400404 | CDH5            | Promoter      |              |
| cg05976840 | 16 | 67189804 | TRADD           | Body          | Island shore |
| cg12654412 | 16 | 71459826 |                 |               | Island       |
| cg05969150 | 16 | 72882495 | ZFH3            | Body          |              |
| cg05915866 | 16 | 73090838 | ZFH3            | Promoter      | Island shore |
| cg27466129 | 16 | 85060822 | KIAA0513        | Promoter      | Island shore |
| cg05832869 | 16 | 85240650 |                 |               | Island shore |
| cg08550517 | 16 | 85414644 |                 |               |              |
| cg07082267 | 16 | 85429035 |                 |               |              |
| cg27586417 | 16 | 85577800 |                 |               |              |
| cg09001440 | 16 | 87952767 | CA5A            | Body          |              |
| cg13049862 | 17 | 1384170  | MYO1C           | Body          | Island shelf |
| cg09940188 | 17 | 1686671  | SMYD4           | Body          |              |
| cg13916835 | 17 | 2078431  | SMG6            | Body          |              |
| cg03433048 | 17 | 4806453  | CHRNE           | Promoter      | Island shore |
| cg04970434 | 17 | 4838096  | GP1BA           | 3'UTR         |              |
| cg13377102 | 17 | 7832764  | KCNAB3          | Promoter      | Island       |
| cg23365801 | 17 | 7832909  | KCNAB3          | Promoter      | Island       |
| cg16513459 | 17 | 7832932  | KCNAB3          | Promoter      | Island       |
| cg04658021 | 17 | 8056967  | PER1            | Promoter      | Island shore |
| cg01538166 | 17 | 17743987 |                 |               | Island       |
| cg13895343 | 17 | 26708773 | SARM1           | Body          | Island       |
| cg05388545 | 17 | 29152968 | CRLF3           | Promoter      | Island shore |
| cg14834285 | 17 | 33897374 |                 |               | Island shelf |
| cg04193015 | 17 | 35596680 | ACACA           | Body          |              |
| cg25416319 | 17 | 37080373 |                 |               |              |
| cg14377681 | 17 | 37875709 | ERBB2           | Body          | Island shelf |
| cg19003337 | 17 | 39780836 | KRT17           | Promoter      |              |
| cg10035737 | 17 | 42840005 | ADAM11          | Body          | Island shelf |
| cg09983216 | 17 | 46679715 | LOC404266;HOXB6 | Body;Promoter |              |
| cg17179862 | 17 | 46681362 | LOC404266;HOXB6 | Body;Promoter | Island shelf |
| cg19057899 | 17 | 47093955 | IGF2BP1         | Body          | Island shore |
| cg11440486 | 17 | 48585216 | MYCBPAP         | Promoter      | Island shore |
| cg00901687 | 17 | 48585270 | MYCBPAP         | Promoter      | Island shore |
| cg13896106 | 17 | 72754589 | SLC9A3R1        | Body          |              |
| cg09096555 | 17 | 72848358 | GRIN2C          | Body          | Island       |
| cg20322093 | 17 | 72931788 | OTOP3           | Promoter      | Island       |
| cg06245338 | 17 | 74410839 | UBE2O           | Body          |              |
| cg21868063 | 17 | 74869001 | MGAT5B          | Body          | Island shelf |

|            |    |          |              |                   |              |
|------------|----|----------|--------------|-------------------|--------------|
| cg00863893 | 17 | 76876239 | TIMP2        | Body              |              |
| cg24211657 | 17 | 76886742 | TIMP2        | Body              |              |
| cg12125614 | 17 | 76886835 | TIMP2        | Body              |              |
| cg19413066 | 17 | 76965347 |              |                   |              |
| cg13392258 | 17 | 77806190 |              |                   | Island       |
| cg17295878 | 17 | 77924665 | TBC1D16      | Body              | Island shore |
| cg25447164 | 17 | 78417789 |              |                   | Island shore |
| cg06443034 | 17 | 78417973 |              |                   | Island       |
| cg09164913 | 17 | 78963221 |              |                   | Island shelf |
| cg19761273 | 17 | 80232096 | CSNK1D       | Promoter          | Island shore |
| cg21088259 | 17 | 81039990 | METRNL       | Body              | Island shore |
| cg24914483 | 18 | 2653997  |              |                   | Island shore |
| cg18069568 | 18 | 43683922 | ATP5A1;HAUS1 | Promoter;Promoter | Island shore |
| cg06418113 | 18 | 43915901 | RNF165       | Body              | Island shore |
| cg20916427 | 18 | 44627440 | KATNAL2      | 3'UTR             |              |
| cg23484392 | 18 | 66465334 | CCDC102B     | Promoter          |              |
| cg12645852 | 18 | 74198774 |              |                   | Island shelf |
| cg24304425 | 19 | 840985   | PRTN3        | Promoter          | Island shelf |
| cg10592521 | 19 | 1560658  | MEX3D        | Body              | Island shelf |
| cg27552857 | 19 | 4542866  | SEMA6B       | 3'UTR             | Island shore |
| cg24236839 | 19 | 5038822  | KDM4B        | Body              | Island shore |
| cg05025071 | 19 | 6887530  | EMR1         | Promoter          |              |
| cg14074174 | 19 | 7986206  | SNAPC2       | Body              | Island shore |
| cg10604476 | 19 | 10403908 | ICAM5        | Body              | Island       |
| cg27259408 | 19 | 10427154 | FDX1L;RAVER1 | Promoter;3'UTR    | Island shore |
| cg18321051 | 19 | 12251893 | ZNF20        | Promoter          | Island shore |
| cg04334723 | 19 | 13054427 | CALR         | Body              | Island shelf |
| cg25605731 | 19 | 13054434 | CALR         | Body              | Island shelf |
| cg25690897 | 19 | 15133948 | CCDC105      | 3'UTR             | Island shore |
| cg11597043 | 19 | 15751612 | CYP4F3       | Promoter          |              |
| cg17744295 | 19 | 16178097 | TPM4         | Promoter          | Island shore |
| cg22041417 | 19 | 16178195 | TPM4         | Promoter          | Island shore |
| cg16664617 | 19 | 17607007 | SLC27A1      | Body              | Island shore |
| cg23331484 | 19 | 33718148 | SLC7A10      | Promoter          | Island shore |
| cg08196968 | 19 | 38746749 | PPP1R14A     | Body              | Island       |
| cg14299480 | 19 | 38876666 | GGN          | Body              | Island       |
| cg11199014 | 19 | 39798563 | LRFN1        | Body              | Island       |
| cg22840076 | 19 | 41782156 | HNRNPUL1     | Body              |              |
| cg22891070 | 19 | 46801642 | HIF3A        | Body              | Island shore |
| cg16672562 | 19 | 46801672 | HIF3A        | Promoter          | Island shore |
| cg23548163 | 19 | 46807119 | HIF3A        | Promoter          | Island       |
| cg16617301 | 19 | 46999109 | PNMAL2       | Promoter          | Island       |
| cg24718465 | 19 | 46999118 | PNMAL2       | Promoter          | Island       |
| cg11269599 | 19 | 52391304 | ZNF577       | Promoter          | Island       |
| cg22331349 | 19 | 52391350 | ZNF577       | Promoter          | Island       |
| cg22337438 | 19 | 54327437 | NLRP12       | Promoter          |              |
| cg04972979 | 20 | 749148   | C20orf54     | Promoter          |              |
| cg24263062 | 20 | 2730191  | EBF4         | Body              | Island       |
| cg05825244 | 20 | 2730488  | EBF4         | Body              | Island       |
| cg25551168 | 20 | 3065343  | AVP          | Promoter          | Island shore |
| cg24165121 | 20 | 23398291 | NAPB         | Body              | Island shelf |
| cg09333580 | 20 | 31606541 | BPIL1        | Body              |              |
| cg01260366 | 20 | 32307172 | PXMP4        | Body              | Island shore |
| cg18942298 | 20 | 42809578 | JPH2         | Body              |              |
| cg19811118 | 20 | 43160245 | PKIG         | Promoter          | Island shore |
| cg06260709 | 20 | 48626621 |              |                   | Island       |
| cg11074047 | 20 | 50157455 | NFATC2       | Body              | Island shore |
| cg11853697 | 20 | 60510235 | CDH4         | Body              | Island shore |
| cg03640203 | 20 | 61145529 | C20orf200    | Promoter          | Island shore |

|            |    |          |                    |               |              |
|------------|----|----------|--------------------|---------------|--------------|
| cg11726250 | 20 | 61924405 | COL20A1            | Promoter      | Island shelf |
| cg02231404 | 20 | 62679635 | SOX18              | Body          | Island       |
| cg22138735 | 20 | 62679713 | SOX18              | Body          | Island       |
| cg16057826 | 21 | 36041334 | CLIC6              | Promoter      | Island       |
| cg05089897 | 21 | 38886664 | DYRK1A             | 3'UTR         |              |
| cg26390598 | 21 | 41032396 | B3GALT5            | Promoter      |              |
| cg08381918 | 21 | 43221841 | PRDM15             | Body          | Island       |
| cg13762691 | 22 | 17956560 | CECR2              | Promoter      |              |
| cg00281467 | 22 | 23522460 | BCR                | Promoter      | Island shore |
| cg04206417 | 22 | 29601559 | EMID1              | Promoter      | Island       |
| cg21361322 | 22 | 31500896 | SELM               | 3'UTR         | Island       |
| cg01794929 | 22 | 31500940 | SELM               | 3'UTR         | Island       |
| cg06942979 | 22 | 31501382 | SELM               | Body          | Island shore |
| cg26373518 | 22 | 31518942 | INPP5J             | Promoter      |              |
| cg01264106 | 22 | 38071602 | LGALS1             | Promoter      | Island shore |
| cg05903330 | 22 | 39542136 | CBX7               | Body          | Island       |
| cg01194538 | 22 | 43043270 | CYB5R3             | Promoter      | Island shore |
| cg26394940 | 22 | 46449461 | C22orf26;LOC150381 | Body;Promoter | Island shore |

**Supplementary table 3:**

78 consistent dmCpG sites between three HGP family members and healthy donors.

| <b>TargetID</b> | <b>Chr.</b> | <b>Position</b> | <b>Gene symbol</b> | <b>Location</b>   | <b>CpG context</b> |
|-----------------|-------------|-----------------|--------------------|-------------------|--------------------|
| cg26840333      | 1           | 4711419         |                    |                   | Island shelf       |
| cg24875017      | 1           | 17026258        | ESPNP              | Body              | Island             |
| cg26561681      | 1           | 21376633        | EIF4G3             | Promoter          |                    |
| cg21171625      | 1           | 38022607        | DNALI1             | Promoter          | Island             |
| cg09502069      | 1           | 224372558       | DEGS1              | Body              | Island shore       |
| cg02464665      | 1           | 231156359       | MIR1182;FAM89A     | Promoter;Body     |                    |
| cg10075506      | 2           | 1817351         | MYT1L              | Body              |                    |
| cg04131969      | 2           | 33951647        | MYADML             | Body              | Island shore       |
| cg12302982      | 2           | 39471028        |                    |                   | Island             |
| cg02975463      | 2           | 45178953        |                    |                   | Island shore       |
| cg14608581      | 2           | 70122240        | SNRNP27            | Body              |                    |
| cg11067786      | 2           | 74780467        | LOXL3;DOK1         | Promoter;Promoter | Island shore       |
| cg26682661      | 3           | 38561466        | EXOG               | Body              |                    |
| cg00653460      | 3           | 101406220       | RPL24              | Promoter          | Island shore       |
| cg04556126      | 3           | 147106561       | ZIC4               | 3'UTR             | Island shore       |
| cg03885646      | 3           | 156273458       | SSR3               | Promoter          | Island shore       |
| cg01797371      | 3           | 195578240       |                    |                   |                    |
| cg20507963      | 4           | 13541863        |                    |                   | Island shore       |
| cg15398841      | 4           | 74847761        | PF4                | Promoter          | Island             |
| cg22985016      | 5           | 497397          | SLC9A3             | Body              | Island shore       |
| cg17774559      | 5           | 1879698         | IRX4               | Body              | Island             |
| cg27586797      | 5           | 13664584        |                    |                   |                    |
| cg11937107      | 5           | 72511061        |                    |                   | Island shore       |
| cg21133273      | 5           | 72526964        |                    |                   | Island shore       |
| cg18117367      | 5           | 140213783       | PCDHA cluster      | Promoter          | Island shore       |
| cg22764044      | 5           | 178986830       | RUFY1              | Promoter          | Island             |
| cg24892966      | 6           | 27526023        |                    |                   |                    |
| cg11574174      | 6           | 31237034        | HLA-C              | Body              | Island shore       |
| cg10923662      | 6           | 32064258        | TNXB               | Body              | Island             |
| cg15708909      | 6           | 32487314        | HLA-DRB5           | Body              | Island shelf       |
| cg11387340      | 6           | 166970727       | RPS6KA2            | Body              |                    |
| cg06119452      | 6           | 169621662       | THBS2              | Body              | Island shore       |
| cg27084028      | 7           | 6836436         | RSPH10B            | Body              |                    |
| cg10186435      | 7           | 22492438        | MGC87042           | Body              |                    |
| cg01579884      | 7           | 37004390        | ELMO1              | Promoter          |                    |
| cg01953390      | 7           | 44105764        | PGAM2              | Promoter          | Island shore       |
| cg16562776      | 7           | 56606401        |                    |                   |                    |
| cg26162326      | 7           | 75957061        | YWHAG              | 3'UTR             | Island shore       |
| cg04671734      | 8           | 2591207         |                    |                   |                    |
| cg04122358      | 8           | 2591265         |                    |                   |                    |
| cg08242633      | 8           | 2591411         |                    |                   |                    |
| cg08781728      | 8           | 21882587        | NPM2               | Promoter          | Island             |
| cg06226386      | 8           | 22500449        | FLJ14107;BIN3      | Promoter;Body     |                    |
| cg00225196      | 8           | 37556863        |                    |                   | Island shore       |
| cg17816771      | 8           | 91099036        |                    |                   |                    |
| cg06730756      | 8           | 142198993       | DENND3             | Body              |                    |
| cg11284147      | 8           | 144437914       |                    |                   | Island shelf       |
| cg13979884      | 9           | 74061171        |                    |                   | Island shore       |
| cg00748149      | 9           | 128171030       |                    |                   | Island             |
| cg07044115      | 10          | 123100181       |                    |                   |                    |
| cg15996480      | 10          | 133484592       |                    |                   |                    |
| cg01612681      | 11          | 2322386         | C11orf21;TSPAN32   | Body;Promoter     |                    |
| cg13308137      | 11          | 47528955        | CUGBP1             | Promoter          |                    |
| cg07745373      | 11          | 58941415        | DTX4               | Body              | Island shore       |

|            |    |           |           |          |              |
|------------|----|-----------|-----------|----------|--------------|
| cg08923614 | 11 | 74303294  | POLD3     | Promoter | Island shore |
| cg12974393 | 11 | 107779099 |           |          |              |
| cg26654770 | 12 | 740100    | NINJ2     | Body     |              |
| cg08143343 | 12 | 85307152  | SLC6A15   | Promoter | Island shore |
| cg08254200 | 12 | 113229804 | RPH3A     | Promoter |              |
| cg23302649 | 14 | 29243690  | C14orf23  | Body     | Island       |
| cg06394109 | 16 | 1152511   |           |          | Island       |
| cg01412970 | 17 | 17109239  | PLD6      | Promoter | Island       |
| cg03554335 | 17 | 62075151  | C17orf72  | Promoter |              |
| cg02243479 | 17 | 78859959  | RPTOR     | Body     | Island shelf |
| cg07488417 | 18 | 45274578  |           |          | Island shore |
| cg17121205 | 19 | 44009353  | PHLDB3    | Promoter | Island shore |
| cg07557707 | 19 | 58549711  | ZSCAN1    | Body     | Island       |
| cg21235746 | 20 | 5485144   | LOC149837 | Body     |              |
| cg03287299 | 20 | 5485245   | LOC149837 | Promoter |              |
| cg20295248 | 20 | 5485270   | LOC149837 | Promoter |              |
| cg16763089 | 20 | 5485284   | LOC149837 | Promoter |              |
| cg10831901 | 20 | 5485294   | LOC149837 | Promoter |              |
| cg11577716 | 20 | 20258001  | C20orf26  | Body     |              |
| cg16334795 | 21 | 42538894  | BACE2     | Promoter | Island shore |
| cg00944631 | 22 | 20464947  |           |          | Island shelf |
| cg13405775 | 22 | 32599648  | RFPL2     | Promoter |              |
| cg17988310 | 22 | 40355732  | GRAP2     | Body     |              |
| cg05418105 | 22 | 50981406  |           |          | Island shore |
